# Supplementary material
Source: MDPI journal article supplement (https://www.mdpi.com/1424-2818/15/3/456)
Supplement: s1 [file s1 › Figure S1.pdf]

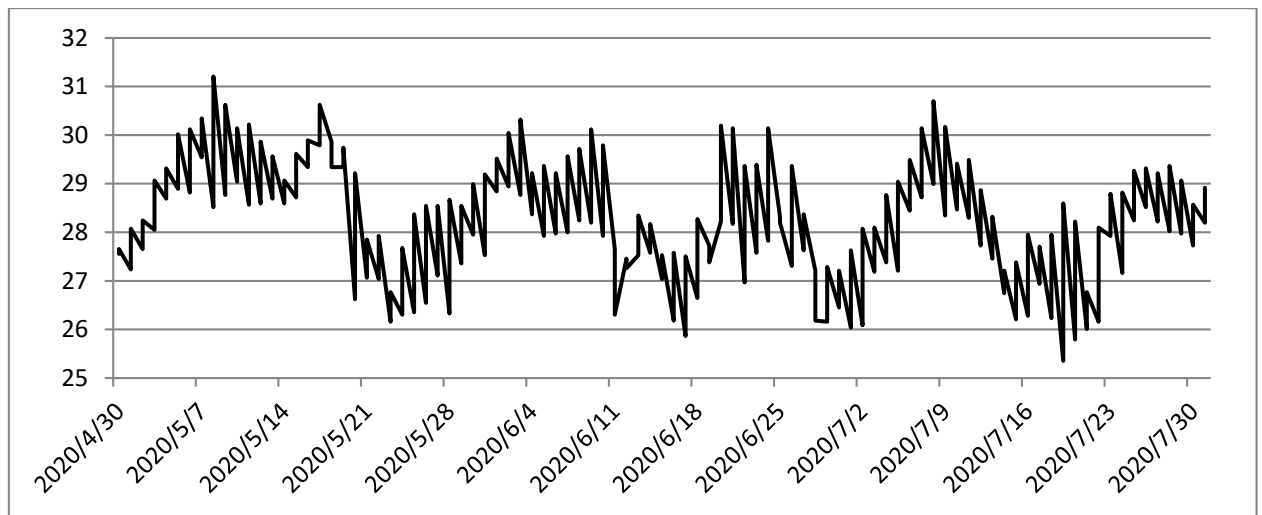

Figure S1. Temperature dynamics for 3 months from April to July 2020 at a depth of 3 m, obtained using HOBO® u22-001 thermologgers at the experimental site in Dam Bay.
