# Supplementary material
Source: MDPI journal article supplement (https://www.mdpi.com/1424-2818/15/3/456)
Supplement: s1 [file s1 › Table S1.pdf]

**Table S1.** List of symbiont taxa found on experimental colonies in association with the coral *Pocillopora verrucosa*.

| ##               | Taxon                       | Ecological group |
|------------------|-----------------------------|------------------|
| <b>Crustacea</b> |                             |                  |
| <b>Decapoda</b>  |                             |                  |
| 1                | <i>Trapezia cymodoce</i>    | O                |
| 2                | <i>Trapezia digitalis</i>   | O                |
| 3                | <i>Trapezia guttata</i>     | O                |
| 4                | <i>Trapezia lutea</i>       | O                |
| 5                | <i>Trapezia plana</i>       | O                |
| 6                | <i>Trapezia septata</i>     | O                |
| 7                | <i>Trapezia serenei</i>     | O                |
| 8                | <i>Trapezia</i> sp.         | O                |
| 9                | <i>Trapezia tigrina</i>     | O                |
| 10               | <i>Cymo andreossyi</i>      | O                |
| 11               | <i>Cymo barunae</i>         | O                |
| 12               | <i>Cymo deplanatus</i>      | O                |
| 13               | <i>Cymo melanodactylus</i>  | O                |
| 14               | <i>Cymo quadrilobatus</i>   | O                |
| 15               | <i>Cymo</i> sp.             | O                |
| 16               | <i>Chlorodiella</i> sp.     | BHC              |
| 17               | <i>Epiactaea nodulosa</i>   | BHC              |
| 18               | Xanthidae gen. sp.          | BHC              |
| 19               | <i>Domecia glabra</i>       | Φ                |
| 20               | <i>Domecia hispida</i>      | Φ                |
| 21               | <i>Menaethius monoceros</i> | BHC              |
| 22               | <i>Hyastenus</i> sp. 1      | BHC              |
| 23               | <i>Hyastenus</i> sp. 2      | BHC              |

|                    |                                  |     |
|--------------------|----------------------------------|-----|
| 24                 | <i>Haplocarcinus marsupialis</i> | O   |
| 25                 | Paguroidea gen.sp.               | BHC |
| 26                 | <i>Alpheus lottini</i>           | O   |
| 27                 | <i>Alpheus bucephalus</i>        | BHC |
| 28                 | <i>Harpiliopsis beaupresii</i>   | O   |
| 29                 | <i>Harpiliopsis depressa</i>     | O   |
| 30                 | <i>Palaemonella rotumana</i>     | Φ   |
| 31                 | Palaemonidae gen. sp.            | BHC |
| 32                 | Hippolytidae gen. sp.            | BHC |
| 33                 | <i>Processa</i> sp.              | Φ   |
| <b>Stomatopoda</b> |                                  |     |
| 34                 | Stomatopoda sp.                  | BHC |
| <b>Amphipoda</b>   |                                  |     |
| 35                 | Amphipoda gen. sp. 1             | BHC |
| 36                 | Amphipoda gen. sp. 2             | BHC |
| 37                 | Amphipoda gen. sp. 3             | BHC |
| 38                 | Amphipoda gen. sp. 4             | BHC |
| 39                 | Amphipoda gen. sp. 5             | BHC |
| 40                 | Caprellidae gen. sp.             | BHC |
| <b>Tanaidacea</b>  |                                  |     |
| 41                 | Tanaidacea gen. sp.              | BHC |
| <b>Polychaeta</b>  |                                  |     |
| 42                 | <i>Polyophthalmus</i> sp.        | BHC |
| 43                 | Nereididae gen. sp. 1            | BHC |
| 44                 | Nereididae gen. sp. 2            | BHC |
| 45                 | Polynoidae gen. sp. 1            | BHC |
| 46                 | Polynoidae gen. sp. 2            | BHC |
| 47                 | Spionidae gen. sp.               | BHC |

|                     |                                |     |
|---------------------|--------------------------------|-----|
| 48                  | Syllidae gen. sp. 1            | BHC |
| 49                  | Syllidae gen. sp. 2            | BHC |
| 50                  | Serpulidae gen. sp.            | BHC |
| 51                  | Phyllodocidae gen. sp.         | BHC |
| 52                  | Hesionidae gen. sp.            | BHC |
| 53                  | Polychaeta gen. sp. 1          | BHC |
| 54                  | Polychaeta gen. sp. 2          | BHC |
| <b>Gastropoda</b>   |                                |     |
| 55                  | <i>Coralliophila monodonta</i> | O   |
| 56                  | Eulimidae gen. sp.             | BHC |
| 57                  | Columbellidae gen. sp. 1       | BHC |
| 58                  | Columbellidae gen.sp.          | BHC |
| 59                  | Gastropoda gen. sp.            | BHC |
| <b>Bivalvia</b>     |                                |     |
| 60                  | <i>Pinctada radiata</i>        | BHC |
| 61                  | <i>Musculus</i> sp.            | BHC |
| 62                  | Ostreidaegen. sp.              | BHC |
| 63                  | Bivalviagen. sp.               | BHC |
| <b>Sipuncula</b>    |                                |     |
| 64                  | Sipuncula gen. sp.             | BHC |
| <b>Turbellaria</b>  |                                |     |
| 65                  | Turbellaria gen. sp.           | BHC |
| <b>Nemertea</b>     |                                |     |
| 66                  | Nemertea gen. sp.              | BHC |
| <b>Ophiuroidea</b>  |                                |     |
| 67                  | <i>Ophiocoma</i> sp.           | BHC |
| 68                  | <i>Ophiothrix</i> sp.          | BHC |
| <b>Osteichthyes</b> |                                |     |
